# Supplementary material for: Low temperature CVD of thermoelectric SnTe thin films from the single source precursor, [nBu3Sn(TenBu)]
Source: Royal Society of Chemistry journal article supplement (doi:10.1039/d0dt03760e), 2020-12-17
Supplement: d0dt03760e5.pdf [file d0dt03760e5.pdf]

ESI for:

Low temperature CVD of thermoelectric SnTe thin films from the single source  
precursor [ $n$ Bu<sub>3</sub>Sn(Te $n$ Bu)]

Fred Robinson, Daniel W. Newbrook, Peter Curran, C. H. (Kees) de Groot, Duncan Hardie, Andrew L. Hector, Ruomeng Huang and Gillian Reid

**Contents:**

**Figure S1** NMR spectra for [ $n$ Bu<sub>3</sub>Sn(Te $n$ Bu)] in CDCl<sub>3</sub> at 295 K.

**Figure S2** Isothermal step TGA experiment of Bu<sub>4</sub>Sn used for vapour pressure calculation.

**Figure S3** Grazing incidence XRD data for SnTe samples FR148T8 (black), FR148T7 (red), FR146T5 (green), FR173T4 (blue) and ICSD-188457 (bottom red).<sup>1</sup>

**Table S1** Lattice parameters calculated from decomposition analysis of XRD patterns of thin films of SnTe, crystallite sizes acquired using the Halder-Wagner method and literature values.

**Figure S4** Lower magnification SEM images of films deposited by CVD onto fused SiO<sub>2</sub> substrates showing uniform film deposition and the corresponding EDX spectra for; tile (a) deposition 1 tile 2, (b) deposition 2 tile 1, (c) deposition 2 tile 2 and (d) deposition 3 tile 1.

**Figure S5** Halder-Wagner plots with trend lines obtained by linear regression analysis.

**Figure S1** NMR spectra for  $[\text{}^n\text{Bu}_3\text{Sn}(\text{Te}^n\text{Bu})]$  in  $\text{CDCl}_3$  at 295 K.

**Figure S1.1** The  $^1\text{H}$  NMR spectrum.

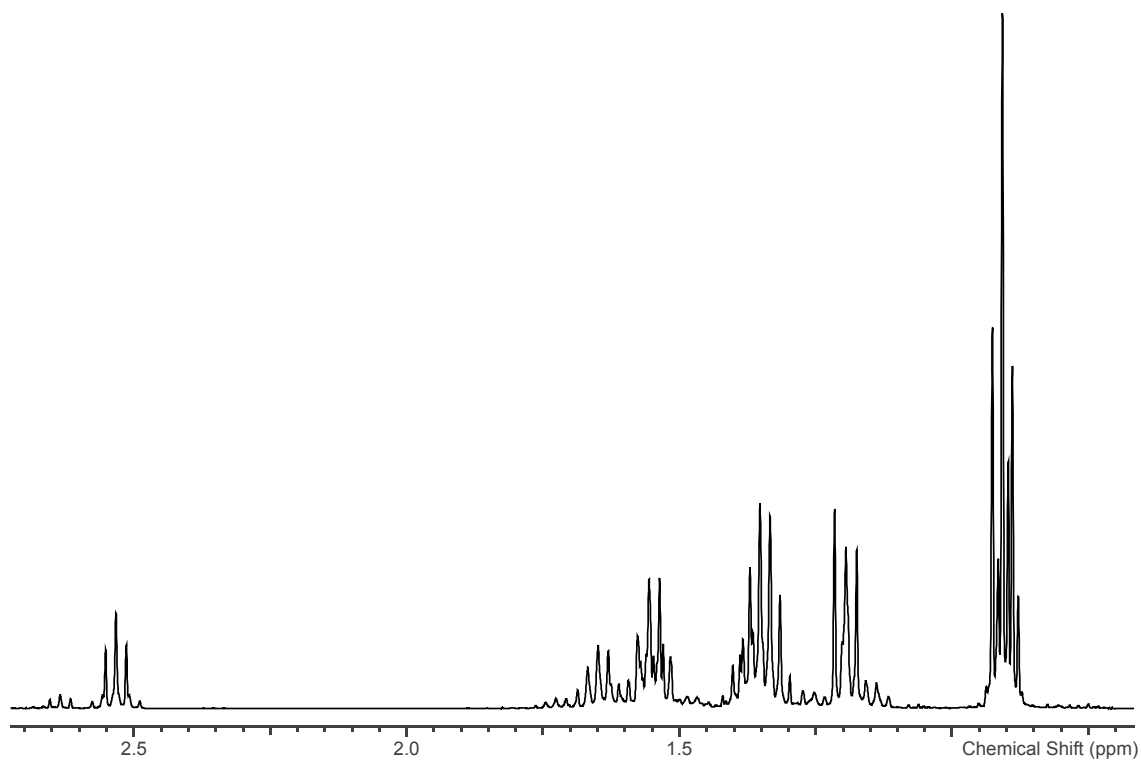

**Figure S1.2** The  $^{13}\text{C}\{^1\text{H}\}$  NMR spectrum.

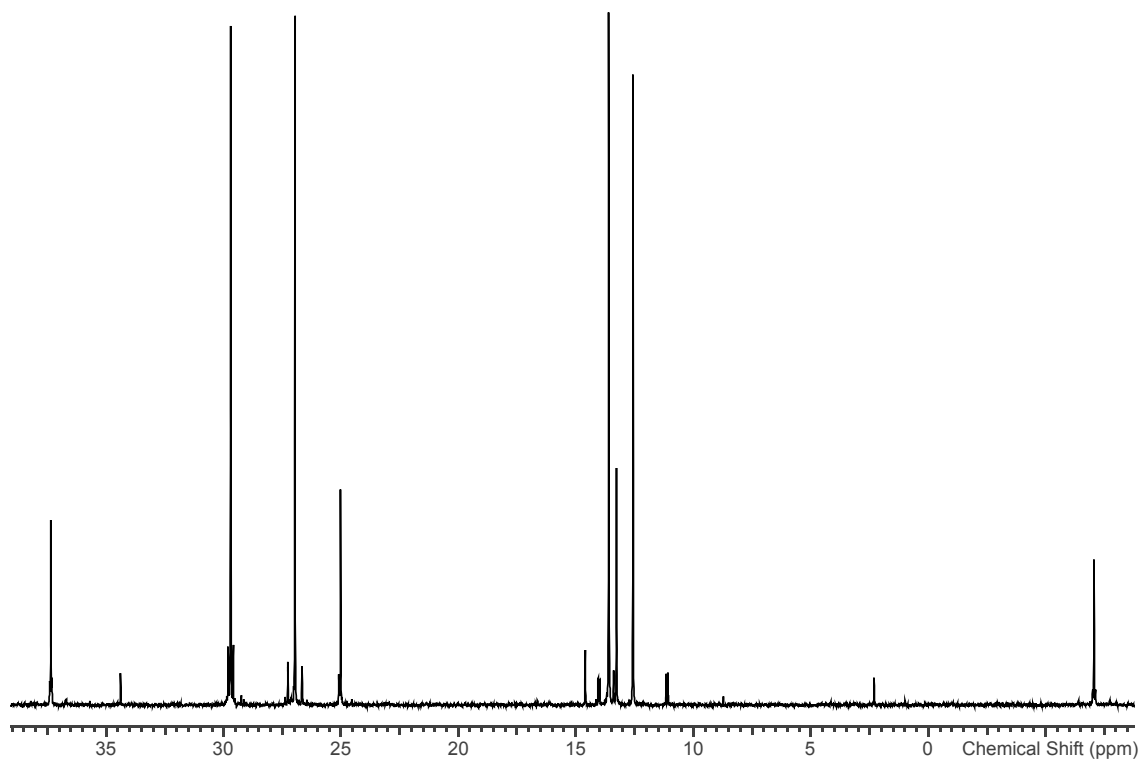

**Figure S1.3** The 2D HSQC NMR spectrum.

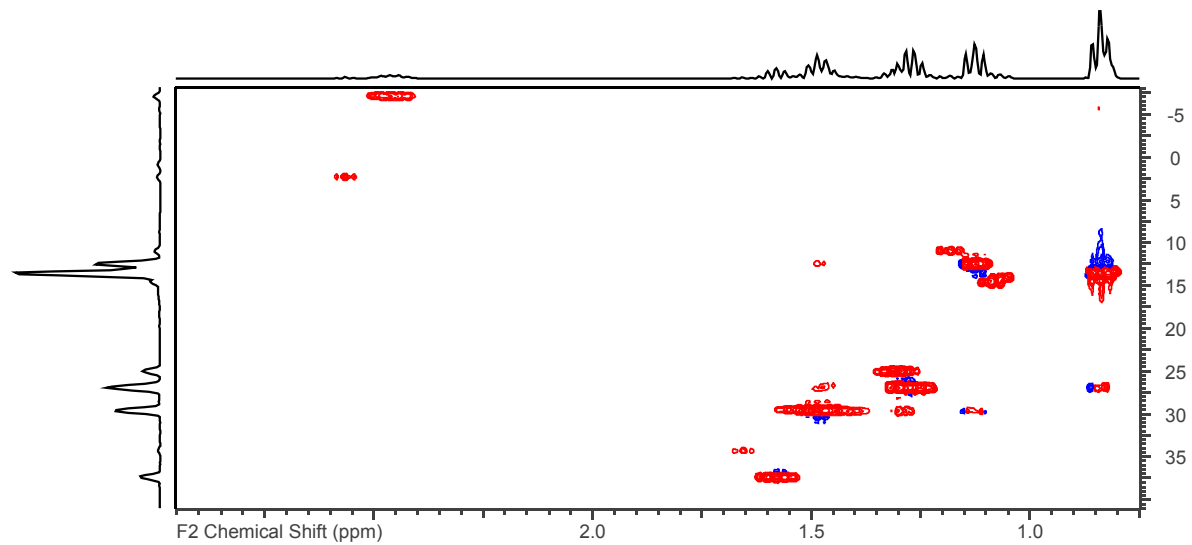

**Figure S1.4** The  $^{119}\text{Sn}\{^1\text{H}\}$  NMR spectrum.

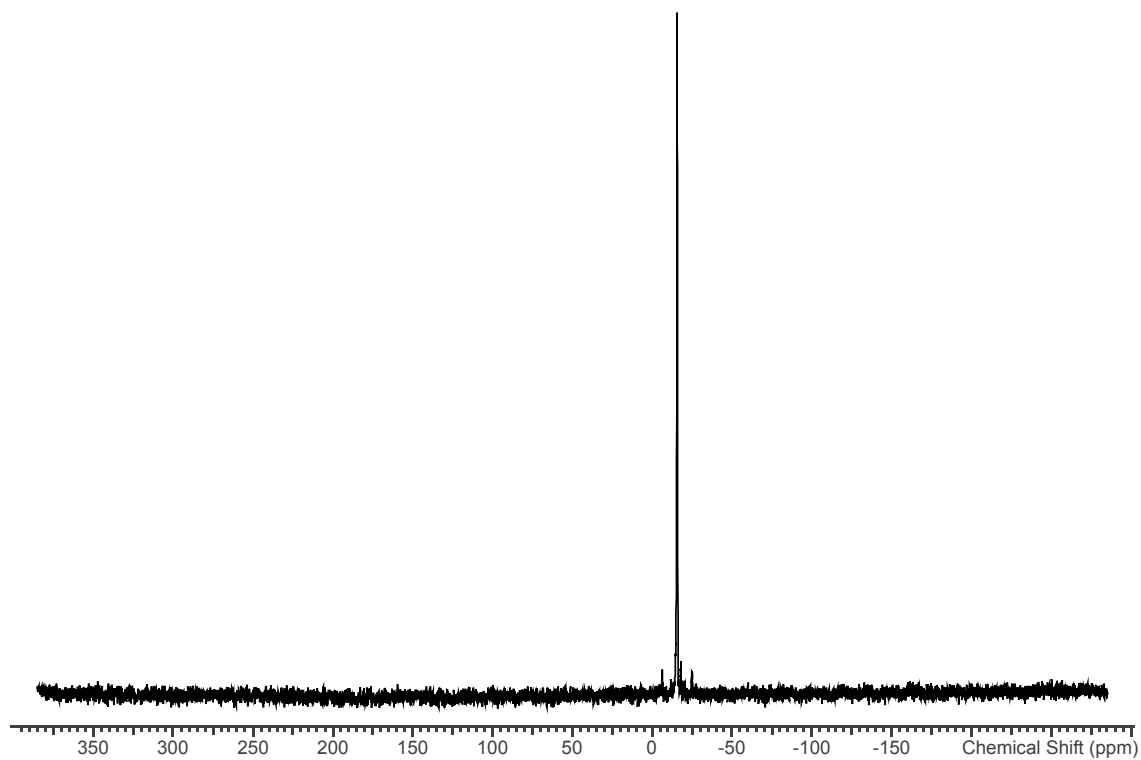

Figure S1.5 The  $^{125}\text{Te}\{^1\text{H}\}$  NMR spectrum.

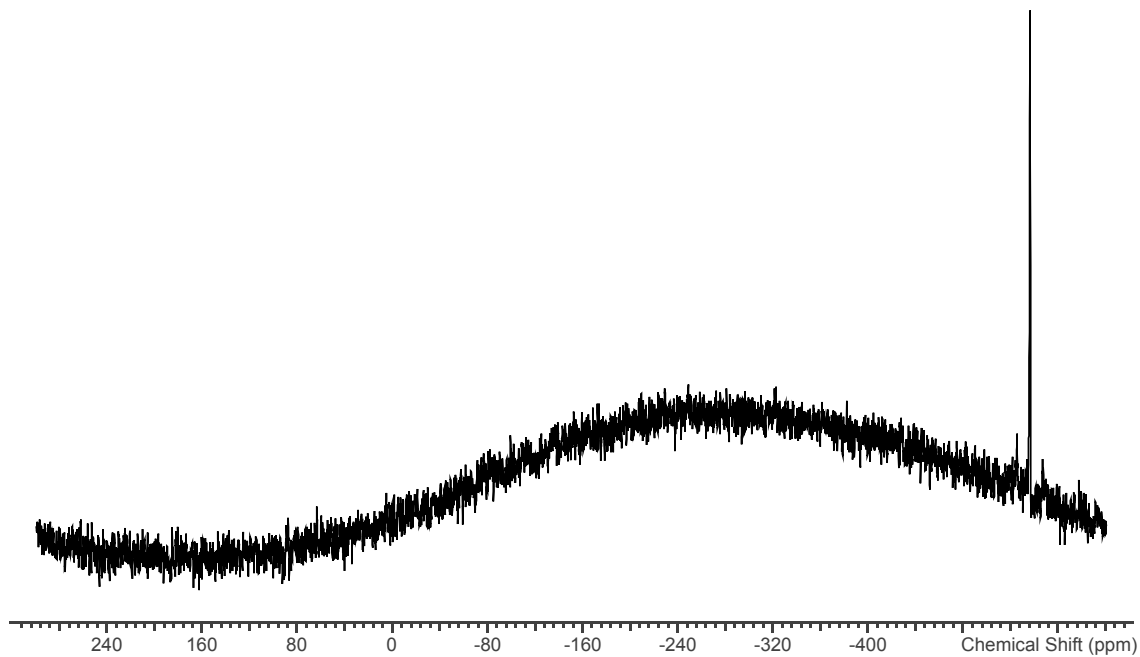

Figure S2 Isothermal step TGA experiment of  $\text{Bu}_4\text{Sn}$  used for vapour pressure calculation.

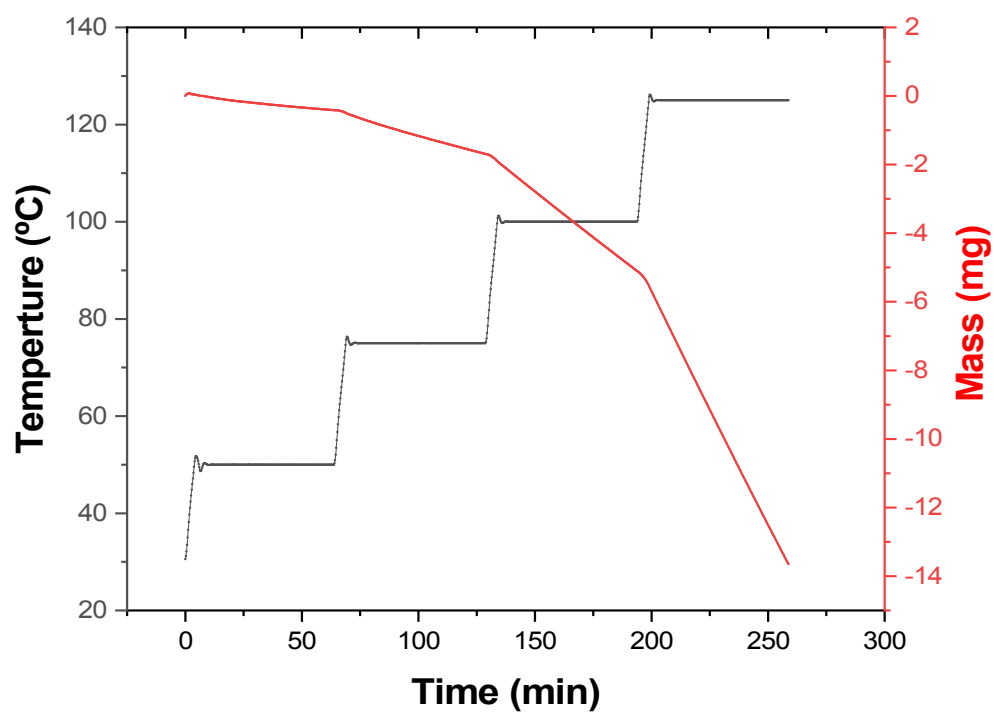

**Figure S3** Grazing incidence XRD data for SnTe samples deposition 2 tile 2 (black), deposition 2 tile 1 (green), deposition 1 tile 1 (purple), deposition 3 tile 1 (blue) and ICSD-188457 (bottom red).<sup>1</sup>

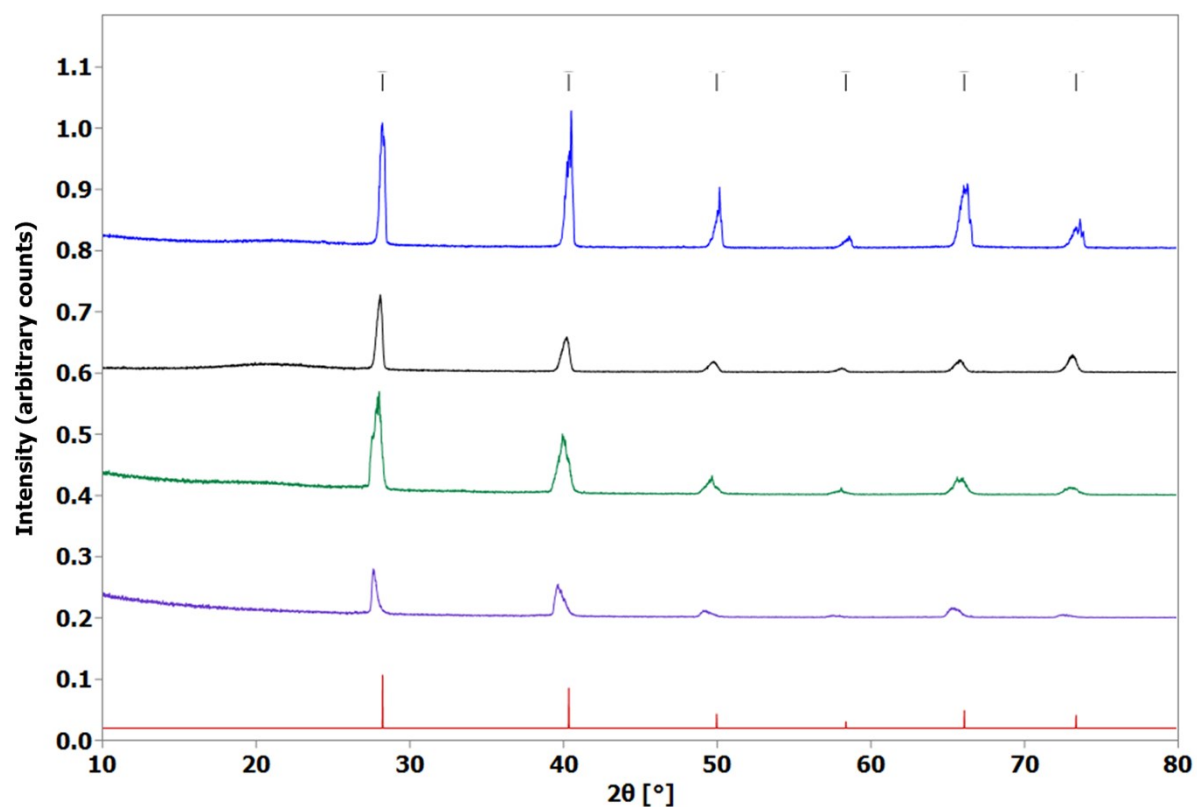

**Table S1** Lattice parameters calculated from decomposition analysis of XRD patterns of thin films of SnTe, crystallite sizes acquired using the Halder-Wagner method and literature values. \*Lanthanum hexaboride standard used and matched to a literature pattern.<sup>2</sup>

| Data                   | Deposition Temperature (°C) | a (Å)       | R <sub>wp</sub> % | R <sub>p</sub> % | Crystallite size (nm) with standard* |
|------------------------|-----------------------------|-------------|-------------------|------------------|--------------------------------------|
| Deposition 1 Tile 1    | 404                         | 6.3881(3)   | 14.30             | 9.82             | 110(30)                              |
| Deposition 2 Tile 1    | 410                         | 6.35250(18) | 15.50             | 10.82            | 100(10)                              |
| Deposition 2 Tile 2    | 355                         | 6.3304(4)   | 12.59             | 9.29             | 210(110)                             |
| Deposition 3 Tile 1    | 434                         | 6.30301(19) | 12.73             | 9.75             | -                                    |
| Bulk SnTe <sup>1</sup> | -                           | 6.318(3)    | 13.70             | 13.60            | -                                    |

**Figure S4** Lower magnification SEM images of films deposited by CVD onto fused SiO<sub>2</sub> substrates showing uniform film deposition and the corresponding EDX spectra for; tile (a) deposition 1 tile 2, (b) deposition 2 tile 1, (c) deposition 2 tile 2 and (d) deposition 3 tile 1.

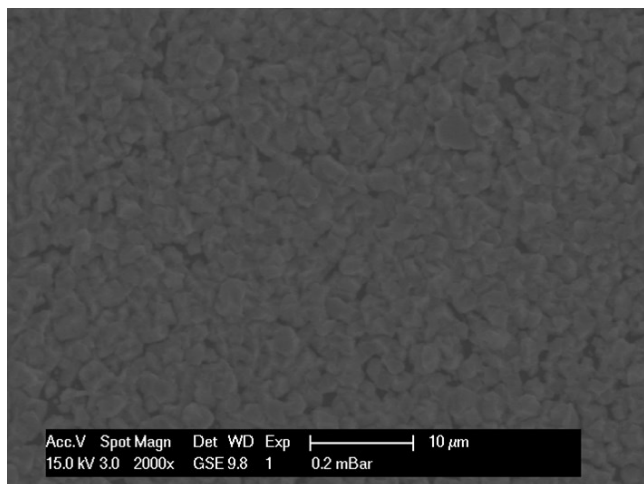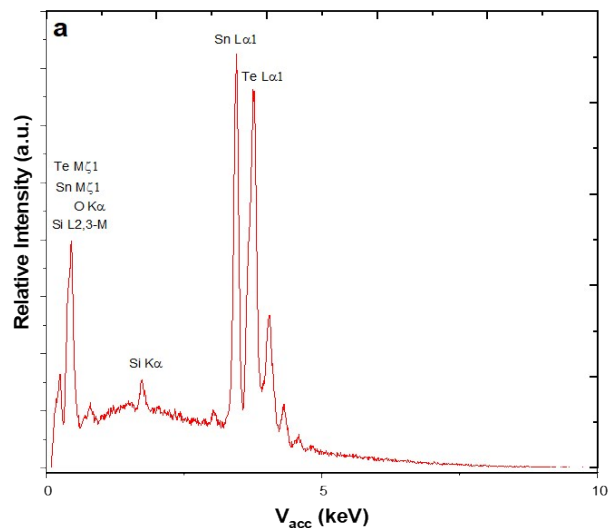

(b)

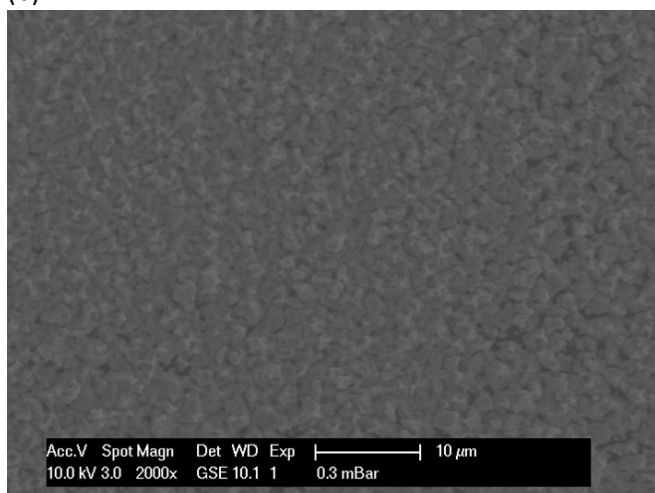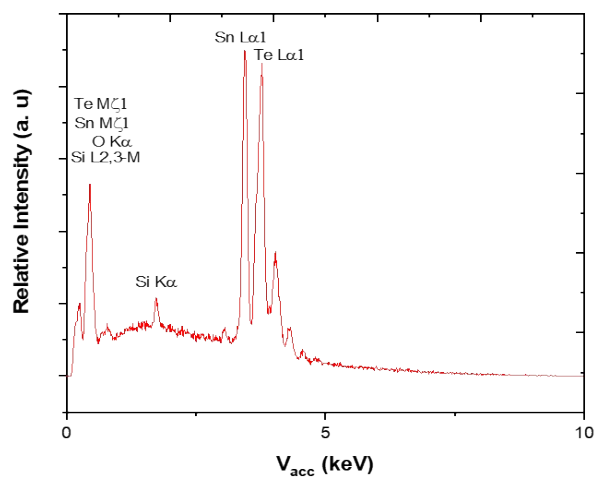

(c)

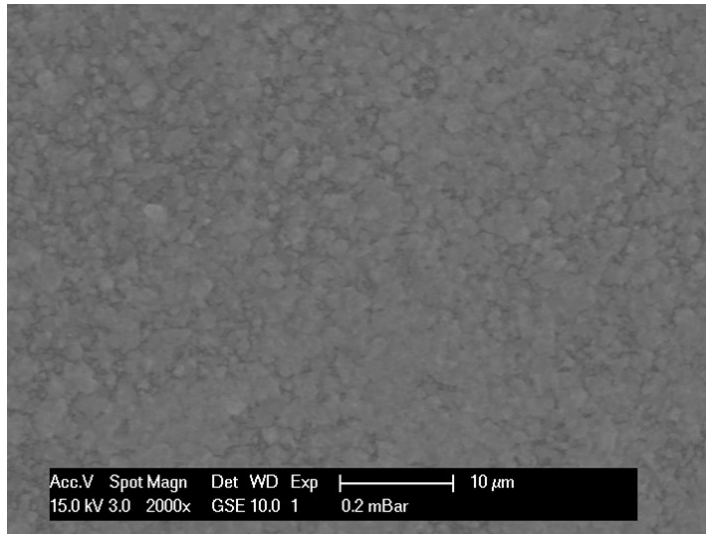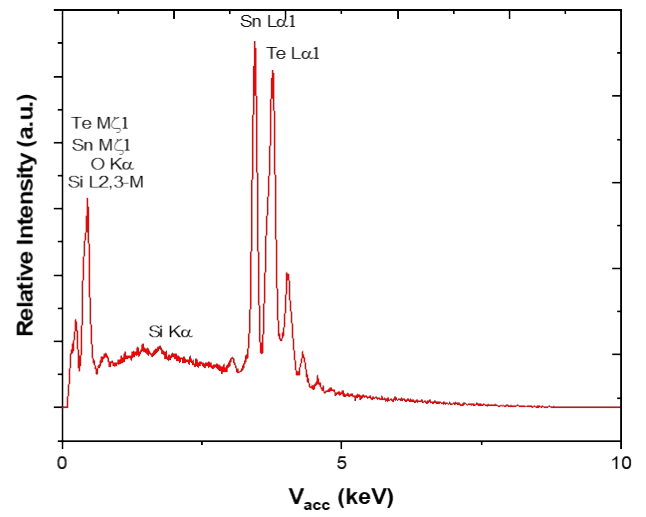

(d)

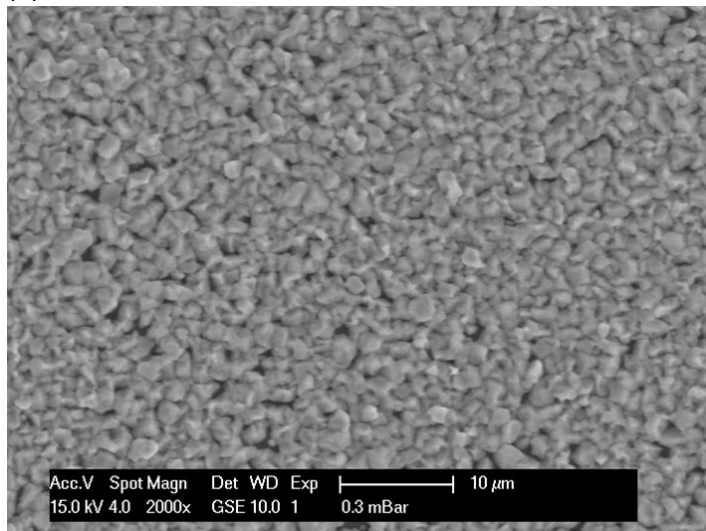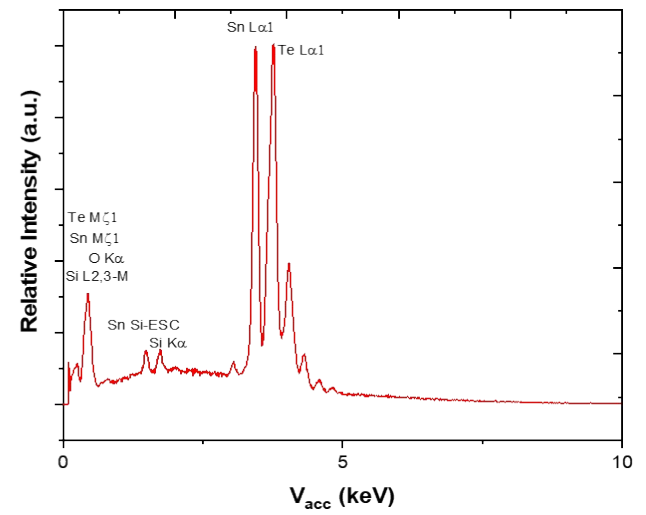

**Figure S5** Halder-Wagner plots with trend lines obtained by linear regression analysis and compared to a lanthanum hexaboride standard to account for instrumental peak broadening.

**Figure S5.1** Plot for Deposition 1 tile 1.

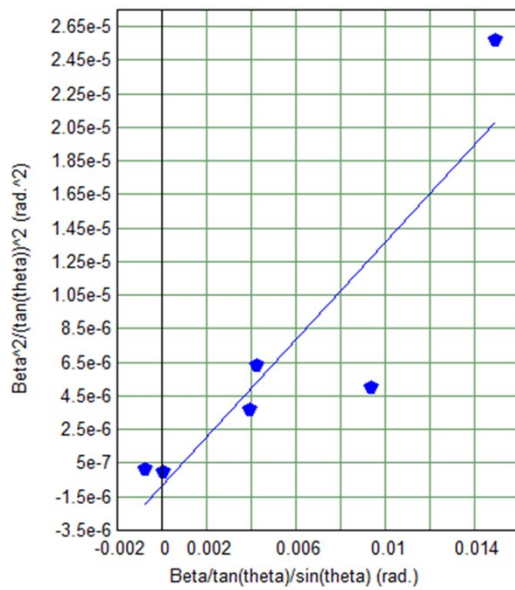

**Figure S5.2** Plot for Deposition 2 tile 1.

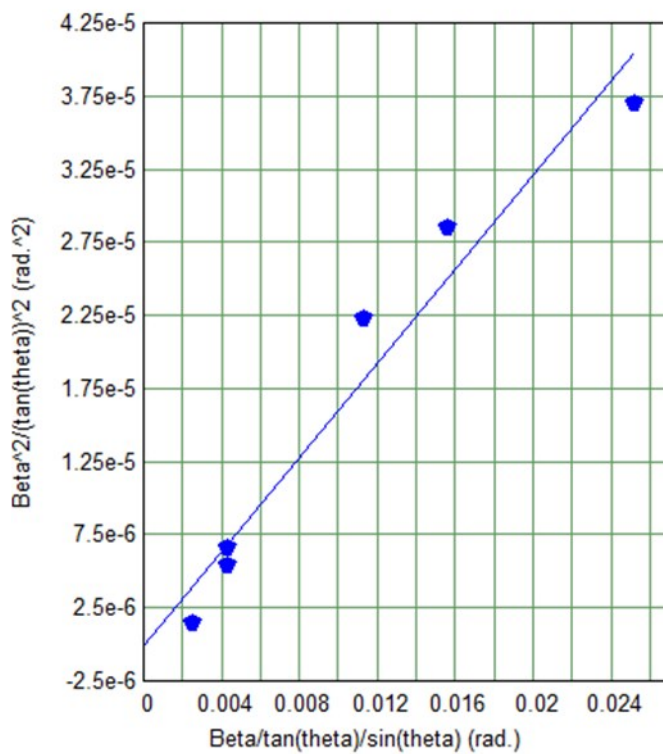



Figure S5.3 Plot for Deposition 2 tile 2.

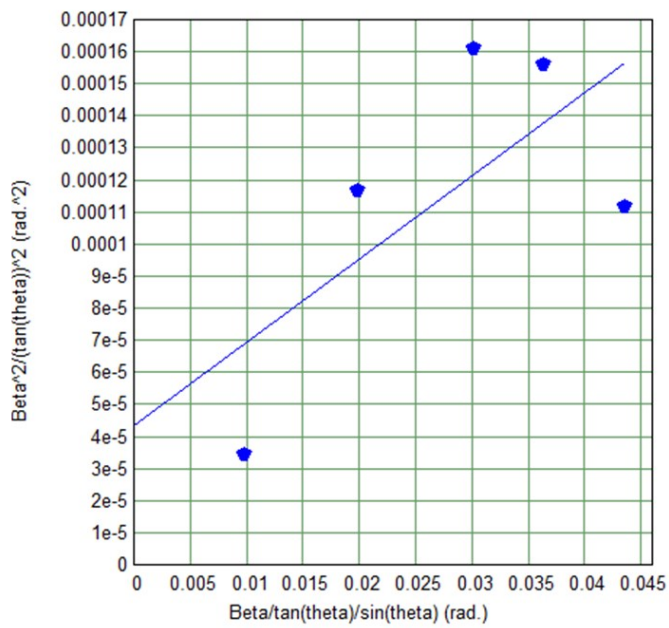

Figure S5.4 Plot for Deposition 3 tile 1.

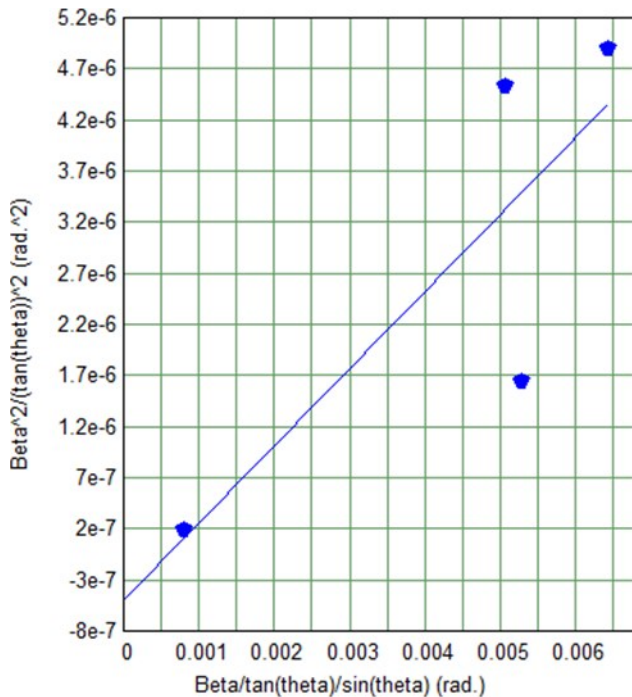

## References

- 1 P. Bauer Pereira, I. Sergueev, S. Gorsse, J. Dadda, E. Müller and R. P. Hermann, *Phys. status. Solidi B*, 2013, **250**, 1300.
- 2 A. A. Eliseev, G. M. Efremmov, V A Kuz'micheva, E. S. Konovalova, V. I. Lazorenko, Y. B. Paderno and S. Y. Khlyustova, *Kristallografiya*, 1986, **31**, 803.
